# Supplementary material for: Using a RE-AIM framework to identify promising practices in National Diabetes Prevention Program implementation
Source: Implement Sci. 2019 Aug 14;14:81. doi: 10.1186/s13012-019-0928-9 (PMC6694543; doi:10.1186/s13012-019-0928-9)
Supplement: Supplementary file 1 — RE-AIM Evaluation Instrument for DP12-1212 Grantees. (XLSX 26 kb) [file 13012_2019_928_MOESM1_ESM.xlsx]

## Sheet: Burden Statement
	Form Approved OMB No. 0920-1090 Exp. Date 12/31/2018
Spreadsheet for National DPP Grantees
Public reporting burden of this collection of information is estimated to average 12 hours per response, including the time for reviewing instructions, searching existing data sources, gathering and maintaining the data needed, and completing and reviewing the collection of information. An agency may not conduct or sponsor, and a person is not required to respond to, a collection of information u…

## Sheet: Grantee Data
Question	Code	Response
Organization Characteristics
1. Grantee/Organization Name	GRANTEE
2. Grant Year	GRANT_YR
3. Fiscal Year	FIS_YR
Program Reach
4. Is there purposeful targeting of NEW disparate or vulnerable populations at the grantee level? If so, what populations are targeted? Please select ALL that apply.	OVULPOP
		If you answer "Other," please specify.
5. Where or at what level are you targeting participant recruitment efforts? Please select ALL that apply.	INTLEVL
		If you answer "Other," please specify.
Program Adoption
6. Did you recruit or select NEW sites in the current grant year? If no, skip to question 9.	SITE_NEW
7. Please provide the name and organizational code (DPRP orgcode) for all NEW sites recruited or selected in the current grant year.	NEWSITE_CODE
8. Among NEW sites that began in the current grant year, how many are currently offering the National DPP lifestyle change classes?	NUM_SITE
9. For the current grant year, how many lifestyle coaches were trained?	TOTTRND
10. For the current grant year, how many master trainer lifestyle coaches were trained?	TOTTRND_MASTER
11. For the current grant year, what was the average number of days of training received for lifestyle coaches?	DAYSTRND
12. For the current grant year, what was the average number of days of training received for master trainers?	DAYSTRND_MASTER
13. Please select from the list who trained NEW lifestyle coaches. Please select ALL that apply.	WHOTRAND
		If you answer "Other," please specify.
14. Did lifestyle coaches receive an additional one day of motivational interview training?	MOT_INTW
15. For the current grant year, please provide the number of employers who were educated about the benefits and cost-savings of the evidence-based lifestyle change program as a covered health benefit for employees.	NUMEMPEDEMPLY
16. For the current grant year, please provide the number of employers who offer the National DPP program on-site.	NUMEMPLY
17. For current grant year, please provide the number of employers offering the National DPP lifestyle change program as a covered benefit or as a wellness benefit for employees.	NUMWELL
18. For the current grant year, please provide the number of employer council events attended to educate participants about the benefits and cost-savings of the evidence-based lifestyle change program.	NUMEMCON
19. For current grant year, please provide the number of health care purchasing coalitions educated about the benefits and cost-savings of the evidence-based lifestyle change program.	NUMHCPRC
20. For current grant year, please provide the number of insurance broker events attended to educate participants about the benefits and cost-savings of the evidence-based lifestyle change program.	NUMINSBK
Program Maintenance
21. Was there any change in policy resulting in a new financing/reimbursement mechanism? If so, who was the target of the change in policy resulting in a new financing/reimbursement mechanism? Please select ALL that apply.	OCOVPOL_OLD
		If you answer "Other," please specify.
22. What was the policy that was changed? Please select ALL that apply.	OCOVPOL_NEW
		If you answer "Other," please specify.
23. How many new insurers and markets are now providing reimbursement or coverage for the lifestyle change program? Please select which type of insurer, and for each insurer please specify the name of the insurer and specify the market (a geographic level indicating the state or region, or county).	INS_NEW
		If you answer "Other," please specify.
24. For current grant year, at what level is the reimbursement or financing mechanism targeted (e.g., state, county, other government or non-profit organization, etc.)? Please select ALL that apply.	SEEKFUND
		If you answer "Other," please specify.
25. Have you communicated with any state health departments or other 1422 awardees about collaboration for diabetes prevention program reimbursement? If so, please describe.	REIMCOMM
Implementation Strategies
26. Please provide the average monetary cost per new lifestyle coach trained.	AVCOSTRN
27. Have you calculated the average cost per participant amongst your program sites? If you are able to report, what is the numeric value of the cost?	AVCOSTPAR
28. How did you or your sub awardee (if applicable) recruit and/or select sites to offer the lifestyle program (i.e., recruitment methods such as materials or campaigns, working with healthcare groups/practices, etc.) in the current grant year? Please select ALL that apply.	OREC_METH_SITE
		If you answer "Other," or "Select based on other criteria" please specify.
29. Did you engage in any activities to recruit participants directly or connect them to a program site? If so, what activities? Please select ALL that apply.	OREC_ACT_PAR
		If you answer "Other," please specify.
30. What materials, if any, were used to help drive/direct participants to the site lifestyle change programs? Please select ALL that apply.	OREC_METH_PAR
		If you answer "Other," please specify.
31. If you engage in any activities to recruit participants through marketing materials, including social media postings; please provide total number per each type of marketing materials or postings used/distributed if available.	NUMMKMAT
		If you answer "Other," please specify.
32. What kinds of incentives and/or behavioral techniques, if any, were used to retain program participants? Please select ALL that apply.	ORG_INCENT
		If you answer "Other," please specify.
33. Please select from the list the barriers to NEW site start-up (if applicable) and implementation in current grant year. Please select ALL that apply.	ORG_BAR
		If you answer "Other," please specify.
34. Please select from the list strategies to address barriers listed above at organizational level for Year 5. Please select ALL that apply.	ORGSRAT
		If you answer "Other," please specify.

## Sheet: Org Response Options
Grantee	GRANT_YR	FIS_YR	OVULPOP	SITE_NEW	OREC_METHSITE	INTLEVL_Y3	OREC_ACT_PAR	OREC_METH_PAR	ORG_INCENT	OCOVPOL_Y2	OCOVPOL_Y3	INS_NEW	WHOTRAND	MOT_INTW	SEEKFUND	ORG_BAR	ORGSRAT
AADE	Year 1	2013	No targeting of NEW disparate or vulnerable populations	Yes	Did not recruit sites/organizations as they were pre-selected	State population	Did not engage in any participant recruitment	CDC/DTTAC Consumer Brochure	Cash prizes	No change in reimbursement policy	Employee coverage benefit	Private insurer (e.g., Cigna, BCBS, United Healthcare): Please Specify insurers and markets	DTTAC	Yes, all	Public insurance plan	Procuring funding	Improve communication with CDC
AHIP	Year 2	2014	Low SES	No	Recruit via organization's website	County/local population	Distributing marketing materials (i.e., brochures, flyers, posters, etc.)	CDC/DTTAC Consumer Poster, 8.5x11	Motivational interviewing	Insurance	Insurance coverage benefit	Government-sponsored: Medicare	University of Pittsburg	No, none	Private insurers	Lifestyle change program reimbursement issues	Offering additional classes
BWHI	Year 3	2015	Under or uninsured	N/A	Recruit via email blast to partners	Health care systems/practices	Marketing campaign (i.e., billboards, other media)	CDC/DTTAC Consumer Poster, 11x17	Nonmonetary benefits: gym membership	Employer	Pay for performance	Government sponsored: Medicaid (please specify insurers and markets)	University of Indiana	Some	Grants	Staff support	Adjusting class schedule/timelines
NACDD	Year 4	2016	Race/ethnicity: African-American		Recruit via leveraging pre-existing relationships	Insurers	Health fairs or other screening and referral activity	CDC/DTTAC HCP Referral Form	Nonmonetary benefits: athletic gear	National	Participant fee waiver or scholarship paid by grant	Government sponsored other (e.g., TriCare) (please specify insurers and markets)	YUSA	N/A	Other government funding	Lack of clear program guidance from CDC	Organizational staff volunteer additional hours
OPTUM	N/A	N/A	Race/ethnicity: Native American		Recruit via phone outreach	Non-profit org	Recruit providers to make referrals (during pt. visit, via letter, EHR)	CDC/DTTAC HCP Brochure	Nonmonetary benefits: grocery store vouchers	Other	New in kind support	State employee sponsored (please specify insurers and markets)	New trainers trained by Master Trainers		Employer funding	Buy-in/engagement from partners	Expanding marketing efforts to community to increase participant enrollment
YUSA			Race/ethnicity: Hispanic/Latino		Recruit via press release	Employers	Org website	ANY Common Ground resource not listed here	Nonmonetary benefits: cookbooks or other dietary materials		Employer sponsored delivery	Other (please specify insurers and markets)	Other		Other funding	Space for program delivery	Restructuring incentive strategies
			Race/ethnicity: Asian/Pacific Islander		Recruit via collaborating with state 1422 grantees	Government entity (state employees)	Presentations/information sessions to community/employees	Grantee- developed marketing materials/campaigns	Non-monetary benefits: healthy food snacks or samples		Other	N/A	N/A		N/A	Healthcare providers or physician resistance to refer to program	Seeking in-kind staff/classroom space
			Race/ethnicity: Other (describe)		Select based on proximity to target demographic	Y-membership	Press release	Materials/campaigns developed by partner organizations	Other		N/A					Low enrollment	Continued engagement with partners/key stakeholders
			Geography: rural or frontier		Select based on readiness assessment (org/partners)	Other	Mass communication (i.e., e-mails, mailings, faxes, phone calls, web postings, newspaper, newsletter)	Other	N/A							Participant drop-out	Organization developed own marketing materials
			Geography: urban		Other	N/A	Social media postings (i.e., FB, Twitter, Instagram)	N/A								Length of lifestyle change program	Implementation/work plan revision
			Elderly		N/A		Lifestyle coach contacting potential participants via MD lists of patients									Lifestyle coach training delay	Educating target audience on evidence-based lifestyle change programs
			Low literacy				TV/radio ad or PSA									Organization structural change	Recruit alternative program providers
			Disabled				Other									Class schedule timing	Finding provider champions
			Other (describe)				N/A									Lack of motivation from participants	Organization developed own Spanish materials/offered class in Spanish
			N/A													Slow hiring process at organizational level	Offer additional training on DPRP data collection
																Public/private insurers' delayed process on membership outreach	Other
																Delay in Spanish curriculum/marketing materials	N/A
																Planning and implementation barriers
																Sub-grantee non-compliance
																Other
																N/A

## Sheet: Org Response Option
Grantee	GRANT_YR	FIS_YR	OVULPOP	SITE_NEW	OREC_METHSITE	INTLEVL_Y5	OREC_ACT_PAR	OREC_METH_PAR	ORG_INCENT	OCOVPOL_Y4	OCOVPOL_Y5	INS_NEW	WHOTRAND	MOT_INTW	SEEKFUND	ORG_BAR	ORGSRAT	NUMMKMAT
AADE	Year 1	2013	No targeting of NEW disparate or vulnerable populations	Yes	Recruit via Organization's website	State Population	Did not engage in any participant recruitment	CDC/DTTAC Consumer Brochure	Cash prizes	Insurance	Employee coverage benefit	Private Insurer (e.g., Cigna, BCBS, United Healthcare): Please Specify insurers and markets	DTTAC	Yes, all	Public Insurance Plan	Procuring funding	Improve communication with CDC	Paper marketing materials (i.e. flyers, pamphlets, brochures, and/or posters)
AHIP	Year 2	2014	Low SES	No	Recruit via Email blast to partners	County/Local Population	Direct recruitment by program staff (i.e. approaching participants one-on-one in their physician office or other setting)	CDC/DTTAC Consumer Poster, 8.5x11	Motivational interviewing	Employer	Insurance coverage benefit	Government-sponsored: Medicare	University of Pittsburg	Yes, some	Private Insurers	Lifestyle change program reimbursement issues	Offering additional classes	Social media postings (i.e., FB, Twitter, Instagram)
BWHI	Year 3	2015	Under or uninsured	N/A	Recruit via Leveraging pre-existing relationships	Health care systems/Practices	Conducting or participating in health fairs and/or other community outreach activities (including blood glucose screening events at worksites)	CDC/DTTAC Consumer Poster, 11x17	Nonmonetary benefits: gym membership	National	Pay for performance	Government sponsored: Medicaid	University of Indiana	No, none	Grants	Staff support	Adjusting class schedule/timelines	Organization website visits
NACDD	Year 4	2016	Race/ethnicity: African-American		Recruit via Phone outreach	Insurers	Recruiting providers to make referrals during patient visit or to send letters/postcards to patients	CDC/DTTAC HCP Referral Form	Nonmonetary benefits: athletic gear	Other	Participant fee waiver or scholarship paid by grant	Government sponsored Other (e.g., TriCare)	Other training entities (i.e. AADE, YUSA)	N/A	Other Government Funding	Lack of clear program guidance from CDC	Organizational staff volunteer additional hours	Other
OPTUM	Year 5	2017	Race/ethnicity: Native American		Recruit via Press release	Community-based or Non-profit org(s)	Recruiting other organizational partners to make direct referrals or recruit via contact lists	CDC/DTTAC HCP Brochure	Nonmonetary benefits: grocery store vouchers	No change in financing/reimbursement mechanism	New in kind support	State Employee sponsored	New trainers trained by Master Trainers		Employer Funding	Buy-in/engagement from partners	Expanding marketing efforts to community to increase participant enrollment	Did not use any marketing materials
YUSA			Race/ethnicity: Hispanic/Latino		Recruit via collaborating with state 1422 grantees	Employers	Advertising and press release in newsletters, local newspapers, radio, or television stations	ANY Common Ground resource not listed here	Nonmonetary benefits: cookbooks or other dietary materials		Employer sponsored delivery	Other	Other		Other Funding	Space for program delivery	Restructuring incentive strategies
			Race/ethnicity: Asian/Pacific Islander		Select based on Proximity to target demographic	Government entity (state employees)	Presentations/information sessions to community/employees	Grantee- developed marketing materials/campaigns	Non-monetary benefits: healthful food snacks or samples		Other	N/A	N/A		N/A	Healthcare providers or physician resistance to refer to program	Seeking in-kind staff/classroom space
			Race/ethnicity: Other (describe)		Select based on Readiness assessment (org/partners)	Y-membership	Volunteer recruiters from previous lifestyle change classes (through word-of-mouth, phone, or email)	Materials/campaigns developed by partner organizations	Other		N/A					Low enrollment	Continued engagement with partners/key stakeholders
			Geography: Rural or frontier		Select based on other criteria	Other	Posting on Organization website, or email blast to members	Other	N/A							Participant drop-out	Organization developed own marketing materials
			Geography: Urban		N/A	N/A	Other	N/A								Length of lifestyle change program	Implementation/work plan revision
			Elderly		Other											Lifestyle coach training delay	Educating target audience on evidence-based lifestyle change programs
			Low literacy													Organization structural change	Recruite alternative program providers
			Disabled													Class schedule timing	Finding provider champions
			Not targeting a vulnerable population													Lack of motivation from participants	Organization developed own Spanish materials/offered class in Spanish
			Other (describe)													Slow hiring process at organizational level	Offer additional training on DPRP data collection
			N/A													Public/private insurers' delayed process on membership outreach	Other
																Delay in Spanish curriculum/marketing materials	N/A
																Planning and implementation barriers
																Sub-grantee non-compliance
																Other
																N/A
