# Supplementary material for: Using a RE-AIM framework to identify promising practices in National Diabetes Prevention Program implementation
Source: Implement Sci. 2019 Aug 14;14:81. doi: 10.1186/s13012-019-0928-9 (PMC6694543; doi:10.1186/s13012-019-0928-9)
Supplement: Supplementary file 2 — RE-AIM Evaluation Instrument for DP12-1212 Affiliate Sites. (XLSX 32 kb) [file 13012_2019_928_MOESM2_ESM.xlsx]

## Sheet: Burden Statement
	Form Approved OMB No. 0920-1090 Exp. Date 12/31/2018
	Spreadsheet for National DPP Intervention Sites
	Public reporting burden of this collection of information is estimated to vary between 30 and 60 minutes, with an average of 45 minutes per response, including the time for reviewing instructions, searching existing data sources, gathering and maintaining the data needed, and completing and reviewing the collection of information. An agency may not conduct or sponsor, and a person is not required…

## Sheet: Site Data
Question	Code	Response
Organization Characteristics
1. Site Name (MUST be the Org code that is provided by the DPRP)	ORGCODE
2. Please select from the list the type of organization that best describes your site.	SITE_DESC
		If you answer "Other," please specify.
3. Please list the full address of your site.	SITE_LOC
4. Grant Year	GRANT_YR
5. Fiscal Year	FIS_YR
6. Year lifestyle change program initiated (i.e., first class conducted)	CLASSDAT
Program Reach
7. If your site has enrolled participants in current grant year, were all participants attending lifestyle change classes at this site funded (full or partially) via the DP12-1212 Cooperative Agreement in current grant year? If yes, skip to question 9.	PARTICIP_FUND
8. If No to question 7, please fill out the spreadsheet "Participants ID" for de-identified participant ID submitted to DPRP for participants who were funded (full or partially) via the DP12-1212 Cooperative Agreement in current grant year.	PARTICIP
9. Please select from the list demographic characteristics of PARTICIPANTS. Please select ALL that apply.	PAR_CHAR
		If you answer "Other," please specify.
10. Is there purposeful targeting of disparate or vulnerable populations during recruitment for program participation at the site level? If so, what populations are targeted? Please select ALL that apply.	SVULPOP
		If you answer "Other," please specify.
Program Adoption
11. Please select from the list the places from which National DPP participants were recruited. Please select ALL that apply.	RECRUTPL
		If you answer "Other," please specify.
			Location Type	Number of New Classes offered in current grant year at this Location	Location Zip Code (Please provide one zip code per class location)
12. In the current grant year, please list the number of and types of locations where classes are offered, and zip codes for all class locations(e.g., employer worksite, community health centers, clinic/practice, community centers, YMCAs, gyms, church, other non-profit, etc.)? Please select ALL that apply.	PROGPLAC
		If you answer "Other," please specify.
13. Please indicate how many of your lifestyle coaches are volunteers, hourly contractors, or salaried employees. If none, write "0".	COACHMET
		If you answer "Other," please specify.
			Please provide total number of lifestyle coaches in the next column. Please note that the total number of coaches for this question must equal the total number of coaches provided in question 18.
14. What is the funding source for lifestyle coaches? Please select ALL that apply.	TYPLCREM
		If you answer "Other," please specify.
15. What is the average salary of a lifestyle coach, if you are able to report this data?	LIFESAL
16. What is the funding source for program coordinators? Please select ALL that apply.	TYPLCOORD
		If you answer "Other," please specify.
17. What is the average salary of a program coordinator, if you are able to report this data?	COORDSAL
18. What are the credentials of the lifestyle coaches? Please indicate the number of coaches with each of the listed credential using the categories provided. Please select only one credential per coach. If none, write "0."	COCHCRED
		If you answer "Other," please specify.
			Please provide total number of lifestyle coaches in the next column. Please note that the total number of coaches with one credential per coach for this question must equal the total number of coaches provided in question 13.
Program Maintenance
19. Is there any policy in place that establishes a financing/reimbursement mechanism? If so, what entities have implemented the financing/reimbursement mechanism policy? Please select ALL that apply.	SCOVPOL
		If you answer "Other," please specify.
20. What was the policy that was established? Please select ALL that apply.	SCOVPOL
		If you answer "Other," please specify.
Implementation Strategies
21. Do you charge participants for the program? If so, and if you are able to report this data, how much do you charge on average per participant?	PAR_PROGCOST
22. Please indicate from the list of primary resources necessary for program start-up and implementation (e.g., partnerships/coalition, in-kind contributions, etc.). Please select ALL that apply.	SITE_RES
		If you answer "Other," please specify.
23. Which DPP curriculum are you using at this site? Please select ALL that apply.	CURRICUL
		If you answer "Other," please specify.
24. What recruitment methods (i.e., materials or campaigns, from healthcare/insurance company patient rosters, etc.) did you use to identify and recruit new participants? Please select ALL that apply.	SRECMETH
		If you answer "Other," please specify.
25. Please select from the list of referral sources to the lifestyle change programs (i.e., clinics, employers/worksites, state health departments, physicians, health centers, private organizations, non-profits, insurers, etc.). Please select ALL that apply.	OREFLSOR
		If you answer "Other," please specify.
26. Are there any participation or completion incentives offered to participants? If so, what are the incentive items? Please select ALL that apply.	SITE_INCENT
		If you answer "Other," please specify.
27. Please select from the list the barriers to program start-up and implementation. Please select ALL that apply.	SITE_BAR
		If you answer "Other," please specify.
28. Please select from the list strategies to address barriers listed above at site level. Please select ALL that apply.	SITESTRAT
		If you answer "Other," please specify.

## Sheet: Org Response Options
Grantee	GRANT_YR	FIS_YR	OVULPOP	SITE_NEW	OREC_METHSITE	INTLEVL_Y3	OREC_ACT_PAR	OREC_METH_PAR	ORG_INCENT	OCOVPOL_Y2	OCOVPOL_Y3	INS_NEW	WHOTRAND	MOT_INTW	SEEKFUND	ORG_BAR	ORGSRAT
AADE	Year 1	2013	No targeting of NEW disparate or vulnerable populations	Yes	Did not recruit sites/organizations as they were pre-selected	State population	Did not engage in any participant recruitment	CDC/DTTAC Consumer Brochure	Cash prizes	No change in reimbursement policy	Employee coverage benefit	Private insurer (e.g., Cigna, BCBS, United Healthcare): Please Specify insurers and markets	DTTAC	Yes, all	Public insurance plan	Procuring funding	Improve communication with CDC
AHIP	Year 2	2014	Low SES	No	Recruit via organization's website	County/local population	Distributing marketing materials (i.e., brochures, flyers, posters, etc.)	CDC/DTTAC Consumer Poster, 8.5x11	Motivational interviewing	Insurance	Insurance coverage benefit	Government-sponsored: Medicare	University of Pittsburg	No, none	Private insurers	Lifestyle change program reimbursement issues	Offering additional classes
BWHI	Year 3	2015	Under or uninsured	N/A	Recruit via email blast to partners	Health care systems/practices	Marketing campaign (i.e., billboards, other media)	CDC/DTTAC Consumer Poster, 11x17	Nonmonetary benefits: gym membership	Employer	Pay for performance	Government sponsored: Medicaid (please specify insurers and markets)	University of Indiana	Some	Grants	Staff support	Adjusting class schedule/timelines
NACDD	Year 4	2016	Race/ethnicity: African-American		Recruit via leveraging pre-existing relationships	Insurers	Health fairs or other screening and referral activity	CDC/DTTAC HCP Referral Form	Nonmonetary benefits: athletic gear	National	Participant fee waiver or scholarship paid by grant	Government sponsored other (e.g., TriCare) (please specify insurers and markets)	YUSA	N/A	Other government funding	Lack of clear program guidance from CDC	Organizational staff volunteer additional hours
OPTUM	N/A	N/A	Race/ethnicity: Native American		Recruit via phone outreach	Non-profit org	Recruit providers to make referrals (during pt. visit, via letter, EHR)	CDC/DTTAC HCP Brochure	Nonmonetary benefits: grocery store vouchers	Other	New in kind support	State employee sponsored (please specify insurers and markets)	New trainers trained by Master Trainers		Employer funding	Buy-in/engagement from partners	Expanding marketing efforts to community to increase participant enrollment
YUSA			Race/ethnicity: Hispanic/Latino		Recruit via press release	Employers	Org website	ANY Common Ground resource not listed here	Nonmonetary benefits: cookbooks or other dietary materials		Employer sponsored delivery	Other (please specify insurers and markets)	Other		Other funding	Space for program delivery	Restructuring incentive strategies
			Race/ethnicity: Asian/Pacific Islander		Recruit via collaborating with state 1422 grantees	Government entity (state employees)	Presentations/information sessions to community/employees	Grantee- developed marketing materials/campaigns	Non-monetary benefits: healthy food snacks or samples		Other	N/A	N/A		N/A	Healthcare providers or physician resistance to refer to program	Seeking in-kind staff/classroom space
			Race/ethnicity: Other (describe)		Select based on proximity to target demographic	Y-membership	Press release	Materials/campaigns developed by partner organizations	Other		N/A					Low enrollment	Continued engagement with partners/key stakeholders
			Geography: rural or frontier		Select based on readiness assessment (org/partners)	Other	Mass communication (i.e., e-mails, mailings, faxes, phone calls, web postings, newspaper, newsletter)	Other	N/A							Participant drop-out	Organization developed own marketing materials
			Geography: urban		Other	N/A	Social media postings (i.e., FB, Twitter, Instagram)	N/A								Length of lifestyle change program	Implementation/work plan revision
			Elderly		N/A		Lifestyle coach contacting potential participants via MD lists of patients									Lifestyle coach training delay	Educating target audience on evidence-based lifestyle change programs
			Low literacy				TV/radio ad or PSA									Organization structural change	Recruit alternative program providers
			Disabled				Other									Class schedule timing	Finding provider champions
			Other (describe)				N/A									Lack of motivation from participants	Organization developed own Spanish materials/offered class in Spanish
			N/A													Slow hiring process at organizational level	Offer additional training on DPRP data collection
																Public/private insurers' delayed process on membership outreach	Other
																Delay in Spanish curriculum/marketing materials	N/A
																Planning and implementation barriers
																Sub-grantee non-compliance
																Other
																N/A

## Sheet: Site Response Options
SITE_DESC	SITE_LOC	GRANT_YR	FIS_YR	SITE_FOCY2	SITE_FOCY3	CURRICUL_Y4	CURRICUL_Y5	PAR_NEW	PAR_CHAR	SVULPOP	SITE_ADAPT	RECRUTPL	SRECMETH	SCOVPOL_Y4	SCOVPOL_Y5	SITE_INCENT	SITE_RES	PROGPLAC	OREFLSOR	COACHMET_Y5	TYPLCREM_Y5	TYPLCOORD_Y5	COCHCRED	SITE_BAR	SITESTRAT	PAR_PROGCOST	COORDSAL
YMCA	AL	Year 1	2013	Yes, all	Employer worksite	Yes	CDC's National DPP- English	Yes	Rural	No targeting of NEW disparate or vulnerable populations	Have not adapted the lifestyle change program	Did not recruit from any NEW places	Did not engage in any NEW participant recruitment	No change in policy	Employee coverage benefit	No incentives for participation or completion were offered	Grant funding	Employer worksite	No NEW referral sources	Volunteer	No additional funding needed: volunteer	No additional funding needed: volunteer	Certified Diabetes Educator	Site’s organizational capacity to implement National DPP	Improve communication/engagement with partners/key stakeholders	No, do not charge for participant fee	They are volunteers with no salary incurred from our organization
Universities/schools	AK	Year 2	2014	No, none	Faith-based org	No	CDC's National DPP- Spanish	No	Urban	Low SES	Delivery bilingual or using non-English language	Hospitals or healthcare systems (including hospital owned practices)	Distributing or displaying paper marketing materials (i.e. flyers, pamphlets, brochures, and/or posters)	Insurance	Insurance coverage benefit	Pedometers	Partnerships/coalitions	Faith-based org	Hospitals or healthcare systems Healthcare clinics/centers/groups (including affiliated physician practices)	Hourly Contractor	No additional funding needed: site-level staff responsibility added without pay increase	No additional funding needed: site-level staff responsibility added without pay increase	Licensed nutritionist or dietician	Procuring funding and/or program reimbursement	Offering additional classes	Yes, and able to report	They are salaried staff and we are able to report their hourly wage; please report
Local health departments	AZ	Year 3	2015	Some	Community center	N/A	Y-DPP (Plan Forward)	N/A	Low-income	Under or uninsured	Use of cultural themes, images, or sayings	Physician practices not affiliated with a healthcare system	Direct recruitment by program staff (i.e. approaching participants one-on-one in their physician office or other setting)	Employer	Pay for performance	Digital physical activity trackers	In-kind contributions	Community center	Physician practices not affiliated with a healthcare system	Salaried	Insurance reimbursement	Insurance reimbursement	Pharmacist	Staff support	Expanding marketing efforts to community to increase participant enrollment	Yes, but not able to report	They are salaried staff, but we are not able to report their hourly wage
Hospitals/healthcare systems/medical groups/physician practices	AR	Year 4	2016	N/A	Government building		Group Lifestyle Balance (U Pitt)		Under or Uninsured	Race/ethnicity: African-American	Addressing traditionally male or female roles	Federally Qualified Health Center (FQHC)	Conducting or participating in health fairs and/or other community outreach activities (including blood glucose screening events at worksites)	National	Participant fee waiver or scholarship paid by grant	Gym memberships	Volunteer staff	Government building (non-community center)	Federally Qualified Health Centers (FQHC)	Other	Grant funding (CDC)	Grant funding (CDC)	Registered nurse	Staff turnover	Offer financial assistance to help participants pay for the program through grant/3rd party payers	N/A	They are hourly contractors and we are able to report their hourly wage; please report
Community-based orgs/community health centers/FQHCs	CA	Year 5	2017		Physician office		Native Lifestyle Balance		Other	Race/ethnicity: Hispanic/Latino	Incorporating cultural dietary restrictions or preferences	Native American clinic/IHS clinic	Recruiting providers to make referrals during patient visit or to send letters/postcards to patients	Organizational	New in-kind support	Physical activity videos or CDs	Access to organization member base	Small business worksite where participants not employed (i.e., car dealership, grocery store, etc.)	Employers/worksites		Grant funding (other governmental)	Grant funding (other governmental)	Physician/Physician Assistant	Lack of clear program guidance	Seeking in-kind classroom space		They are hourly contractors, but we are not able to report their hourly wage
Pharmacy sites	CO				Healthcare center/practice		Help Prevent Diabetes (Wake Forest)		N/A	Race/ethnicity: Native American	Other	Employers/worksites (incl. employer wellness programs)	Recruiting other organizational partners to make direct referrals or recruit via contact lists	Other	Employer sponsored delivery	Athletic gear or clothing	Providers/participants incentives	Healthcare or medical center/practice/clinic (non-hospital)	State or local health departments		Grant funding (other nongovernmental)	Grant funding (other nongovernmental)	Health educator	Buy-in/communication with partners	Pilot an e-referral system from healthcare providers		They are hourly staff and we are able to report their hourly wage; please report
Indian Health Services/Native American/Tribal Health Systems	CT				Y-facilities		New Prevent T2 Curriculum - English			Race/ethnicity: Asian/Pacific Islander		State or local health departments	Advertising and press release in newsletters, local newspapers, radio, or television stations		Other	Calorie King or other type of diet tracking books	Office space, equipment, supplies	Hospital or bldg. on hospital campus	Other government entity		Participant fees (pay part of lifestyle coaching salary)	Participant fees (pay part of coordinator salary)	Exercise specialist	Space for program delivery	Provide additional benefits to participants to access other programs at their facilities		They are hourly staff, but we are not able to report their hourly wage
Business coalition/coop-extension sites	DE				Health plan retail centers		New Prevent T2 Curriculum - Spanish			Race/ethnicity: other (describe)		Other government entity	Social media postings (i.e., FB, Twitter, Instagram)		N/A	MyPlates or other food measuring devices	Human resource capital	University hospital bldg.	Faith-based orgs		In-Kind from partner organization	In-kind from partner organization	Community Health Worker	Healthcare providers or physician resistance to refer to program	Other		N/A
Worksite/employee wellness programs	FL				Cooperative Extensions		Other			Geography: rural or frontier		Community center (i.e., library, Ruritan/Lions club, Centers on Aging, etc.)	Presentations/information sessions to community/employees			Cookbooks	Educational sessions to potential key stakeholders	YMCA	Other non-profit orgs		Other	Other	Other	Low enrollment/recruitment	N/A
Senior/aging/elderly centers	GA				Federally qualified health centers					Geography: urban		YMCA	Volunteer recruiters from previous lifestyle change classes (through word-of-mouth, phone, or email)			Discount coupons	Scale for weight measurement, privacy screen	Fitness centers/gyms	Self-referral or referral via org website/online participant portal		N/A	N/A	N/A	Participant drop-out
Faith-based orgs	HI				Gyms/Recreation centers					Elderly (65+)		Fitness centers/gyms	Posting on Organization website, or email blast to members			Gift cards	Location to hold classes	University center/classroom	Other					Class schedule timing
Health plans/insurers/ managed care org	ID				Other					Disabled		Other	Other			Program access incentives such as bus pass or parking pass	Travel budget to site location	Tribal clinic/center	N/A					Fee charged to participants
Other	IL				N/A					Other (describe)		N/A	Did not use any NEW recruitment methods			Free or reduced child care	Relationship with business groups (Chamber of Commerce, Brokers, Business Coalitions on health)	Cooperative Extension						Competing priorities with organization's other diabetes control program for referral
	IN									N/A						Healthful food snacks or samples	Marketing materials	Other						Competing program with other partners that also offer lifestyle change program at their facilities
	IA															Certificates or plaque/trophy	Other	N/A						Lack of alignment of the program with site mission and values
	KS															Cash prizes	N/A							Perceived difficulty of implementing the program
	KY															Commitment contracts								Other
	LA															Other								N/A
	ME
	MD
	MA
	MI
	MN
	MS
	MO
	MT
	NE
	NV
	NH
	NJ
	NM
	NY
	NC
	ND
	OH
	OK
	OR
	PA
	RI
	SC
	SD
	TN
	TX
	UT
	VT
	VA
	WA
	WV
	WI

## Sheet: New Site Response Options
SVULPOP	RECRUTPL	SRECMETH	SCOVPOL	SCOVPOL_Y3	OFELSOR
No targeting of disparate or vulnerable populations	Hospitals or healthcare systems (including hospital owned practices)	Did not engage in any participant recruitment	No policy in place	Employee coverage benefit	Hospitals or healthcare systems Healthcare clinics/centers/groups (including affiliated physician practices)
Low SES	Physician practices not affiliated with a healthcare system	Distributing or displaying paper marketing materials (i.e. flyers, pamphlets, brochures, and/or posters)	Insurance	Insurance coverage benefit	Physician practices not affiliated with a healthcare system
Under or uninsured	Federally Qualified Health Center (FQHC)	Direct recruitment by program staff (i.e. approaching participants one-on-one in their physician office or other setting)	Employer	Pay for performance	Federally Qualified Health Centers (FQHC)
Race/ethnicity: African-American	Native American clinic/IHS clinic	Conducting or participating in health fairs and/or other community outreach activities (including blood glucose screening events at worksites)	National	Participant fee waiver or scholarship paid by grant	Employers/worksites
Race/ethnicity: Hispanic/Latino	Employers/worksites (incl. employer wellness programs)	Recruiting providers to make referrals during patient visit or to send letters/postcards to patients	Organizational	In kind support	State or local health departments
Race/ethnicity: Native American	State or local health departments	Recruiting other organizational partners to make direct referrals or recruit via contact lists	Other	Employer sponsored delivery	Other government entity
Race/ethnicity: Asian/Pacific Islander	Other government entity	Advertising and press release in newsletters, local newspapers, radio, or television stations		Other	Faith-based orgs
Race/ethnicity: Other (describe)	Community center (i.e., library, Ruritan/Lions club, Centers on Aging, etc.)	Social media postings (i.e., FB, Twitter, Instagram)		N/A	Other non-profit org
Geography: Rural or frontier	YMCA	Presentations/information sessions to community/employees			Self-referral via org website/online participant portal
Geography: Urban	Fitness centers/gyms	Volunteer recruiters from previous lifestyle change classes (through word-of-mouth, phone, or email)			Other
Elderly	Other	Posting on Organization website, or email blast to members			N/A
Disabled	N/A	Other
Other (describe)		N/A
N/A
